# Supplementary material for: Quantitative metabolomics for investigating the value of polyamines in the early diagnosis and therapy of colorectal cancer
Source: PubMed Central journal article supplement (PMC5796997; doi:10.18632/oncotarget.22885), 2017-12-04
Supplement: oncotarget-09-4583-s001.pdf [file oncotarget-09-4583-s001.pdf]

## Quantitative metabolomics for investigating the value of polyamines in the early diagnosis and therapy of colorectal cancer

### SUPPLEMENTARY MATERIALS

**Supplementary Table 1: Amounts of enzymatic activity in plasma (ng/mL) from Normal Rats ( $n = 6$ ) and CRC Rats ( $n = 6$ ) from 4th week to 20th week in the experiment**

|                                            | 4 <sup>th</sup> week |              | 8 <sup>th</sup> week |              | 12 <sup>th</sup> week |              | 16 <sup>th</sup> week |              | 20 <sup>th</sup> week |              |
|--------------------------------------------|----------------------|--------------|----------------------|--------------|-----------------------|--------------|-----------------------|--------------|-----------------------|--------------|
|                                            | CRC Rats             | Normal Rats  | CRC Rats             | Normal Rats  | CRC Rats              | Normal Rats  | CRC Rats              | Normal Rats  | CRC Rats              | Normal Rats  |
| Ornithine Decarboxylase                    | 1.78 ± 0.22*         | 0.71 ± 0.07  | 1.32 ± 0.14*         | 0.73 ± 0.11  | 0.51 ± 0.04*          | 0.87 ± 0.08  | 1.73 ± 0.05*          | 0.66 ± 0.03  | 1.63 ± 0.06*          | 0.81 ± 0.20  |
| Arginine Decarboxylase                     | 0.36 ± 0.08          | 0.46 ± 0.39  | 0.81 ± 0.13*         | 0.37 ± 0.36  | 0.63 ± 0.02           | 0.59 ± 0.15  | 0.81 ± 0.14*          | 0.28 ± 0.39  | 0.76 ± 0.04*          | 0.35 ± 0.09  |
| S-adenosine Methionine Decarboxylase       | 0.57 ± 0.14          | 0.47 ± 0.36  | 0.68 ± 0.02          | 0.55 ± 0.11  | 0.48 ± 0.14           | 0.62 ± 0.18  | 0.51 ± 0.18           | 0.71 ± 0.04  | 0.64 ± 0.06           | 0.74 ± 0.05  |
| Arginine Decarboxylase                     | 0.78 ± 0.15          | 0.63 ± 0.11  | 0.78 ± 0.03          | 0.77 ± 0.11  | 0.64 ± 0.06           | 0.71 ± 0.07  | 1.39 ± 0.13*          | 0.64 ± 0.04  | 1.36 ± 0.23*          | 0.59 ± 0.06  |
| Ornithine Decarboxylase Antizyme 1         | 1.42 ± 0.06*         | 0.75 ± 0.05  | 1.57 ± 0.74*         | 0.66 ± 0.05  | 3.92 ± 0.46*          | 0.74 ± 0.13  | 2.78 ± 0.10*          | 0.74 ± 0.09  | 2.61 ± 0.15*          | 0.72 ± 0.07  |
| Polyamine Oxidase                          | 1.26 ± 0.07          | 1.29 ± 0.03  | 1.92 ± 0.06*         | 1.23 ± 0.05  | 1.19 ± 0.07           | 1.20 ± 0.07  | 2.60 ± 0.01*          | 1.31 ± 0.05  | 2.92 ± 0.57*          | 1.34 ± 0.13  |
| Spermidine and Spermine Acetyl Transferase | 27.79 ± 3.69*        | 44.39 ± 4.40 | 45.50 ± 4.30         | 48.03 ± 8.27 | 33.62 ± 2.74*         | 59.25 ± 5.03 | 34.65 ± 3.61          | 56.78 ± 4.03 | 36.33 ± 5.12          | 50.57 ± 3.30 |
| Spermine Synthase                          | 3.31 ± 0.31          | 3.07 ± 0.58  | 3.19 ± 0.36          | 3.20 ± 0.48  | 3.16 ± 0.76           | 4.17 ± 0.60  | 3.02 ± 0.43           | 3.79 ± 0.78  | 2.55 ± 0.93           | 3.68 ± 0.31  |
| Diamine Oxidase                            | 12.51 ± 0.90         | 11.29 ± 0.79 | 19.51 ± 0.64*        | 11.73 ± 0.63 | 21.26 ± 1.21*         | 12.52 ± 2.35 | 22.80 ± 0.88*         | 11.66 ± 0.36 | 24.02 ± 0.33*         | 10.82 ± 1.38 |
| Lysine Decarboxylase                       | 6.69 ± 0.12          | 7.26 ± 0.36  | 6.54 ± 0.09          | 6.70 ± 0.35  | 6.08 ± 0.47           | 7.34 ± 0.19  | 10.99 ± 0.61*         | 7.39 ± 0.43  | 12.10 ± 0.16*         | 6.36 ± 0.17  |

\* $p < 0.05$ , compared to Normal Rats.  
(mean ± SD)

**Supplementary Table 2: Amounts of enzymatic activity in plasma (ng/mL) from Aidi injection medication rats ( $n = 6$ ) from 12<sup>th</sup> week to 20<sup>th</sup> week in the experiment**

|                                            | 12th week    |              | 16th week    |               | 20th week    |              |
|--------------------------------------------|--------------|--------------|--------------|---------------|--------------|--------------|
|                                            | CRC rats     | Aidi rats    | CRC rats     | Aidi rats     | CRC rats     | Aidi rats    |
| Ornithine Decarboxylase                    | 0.51 ± 0.04  | 0.75 ± 0.14* | 1.73 ± 0.05  | 0.37 ± 0.37*  | 1.63 ± 0.06  | 0.72 ± 0.19* |
| Arginine Decarboxylase                     | 0.63 ± 0.02  | 0.23 ± 0.27* | 0.81 ± 0.14  | 0.35 ± 0.09*  | 0.76 ± 0.04  | 0.30 ± 0.07* |
| S-adenosine Methionine Decarboxylase       | 0.48 ± 0.14  | 0.19 ± 2.24  | 0.51 ± 0.18  | 8.70 ± 0.68*  | 0.64 ± 0.06  | 0.95 ± 0.45  |
| Arginine Decarboxylase                     | 0.64 ± 0.06  | 0.02 ± 0.19* | 1.39 ± 0.13  | 1.23 ± 0.15   | 1.36 ± 0.23  | 0.31 ± 0.45* |
| Ornithine Decarboxylase Antizyme 1         | 3.92 ± 0.46  | 1.70 ± 0.13* | 2.78 ± 0.10  | 2.58 ± 0.25   | 2.61 ± 0.15  | 4.32 ± 0.08* |
| Polyamine Oxidase                          | 1.19 ± 0.07  | 1.94 ± 0.07  | 2.60 ± 0.01  | 1.80 ± 0.01*  | 2.92 ± 0.57  | 2.02 ± 0.18  |
| Spermidine and Spermine Acetyl Transferase | 33.62 ± 2.74 | 44.49 ± 0.44 | 34.65 ± 3.61 | 51.73 ± 6.85* | 36.33 ± 5.12 | 47.82 ± 2.06 |
| Spermine Synthase                          | 3.16 ± 0.76  | 2.42 ± 0.69  | 3.02 ± 0.43  | 1.94 ± 0.12*  | 2.55 ± 0.93  | 2.69 ± 0.45  |
| Diamine Oxidase                            | 21.26 ± 1.21 | 18.60 ± 0.55 | 22.80 ± 0.88 | 22.18 ± 0.79  | 24.02 ± 0.33 | 13.69 ± 1.27 |
| Lysine Decarboxylase                       | 6.08 ± 0.47  | 6.01 ± 0.12  | 10.99 ± 0.61 | 5.90 ± 0.67*  | 12.10 ± 0.16 | 5.44 ± 0.74* |

\* $p < 0.05$ , compared to CRC Rats.  
(mean ± SD)

**Supplementary Table 3: The calibration validation for the analytes in plasma.** See Supplementary\_Table\_3

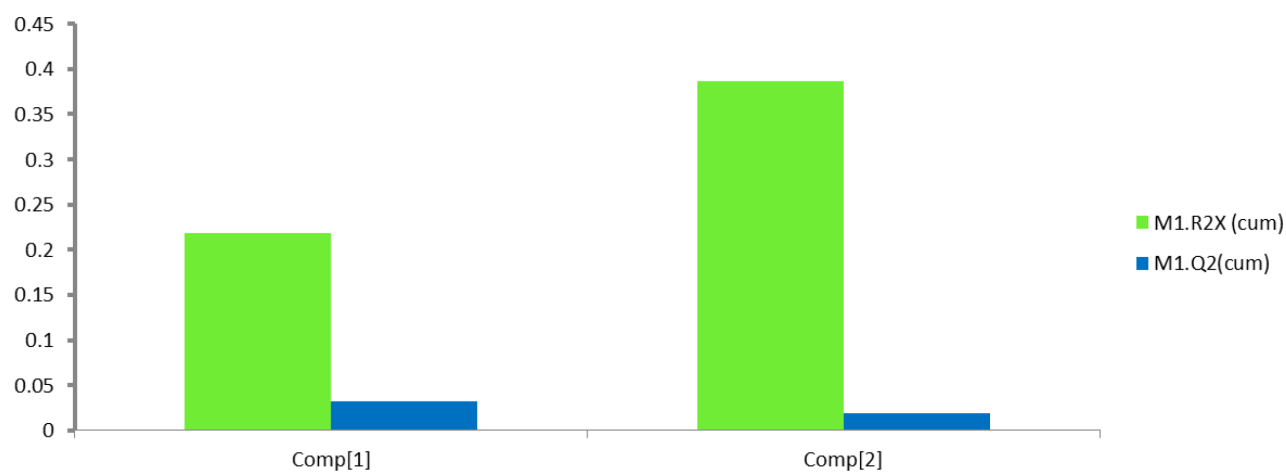

**Supplementary Table 4-1: Analysis of the cumulative contribution rate of polyamine data by PCA in normal and CRC rat's plasma.**

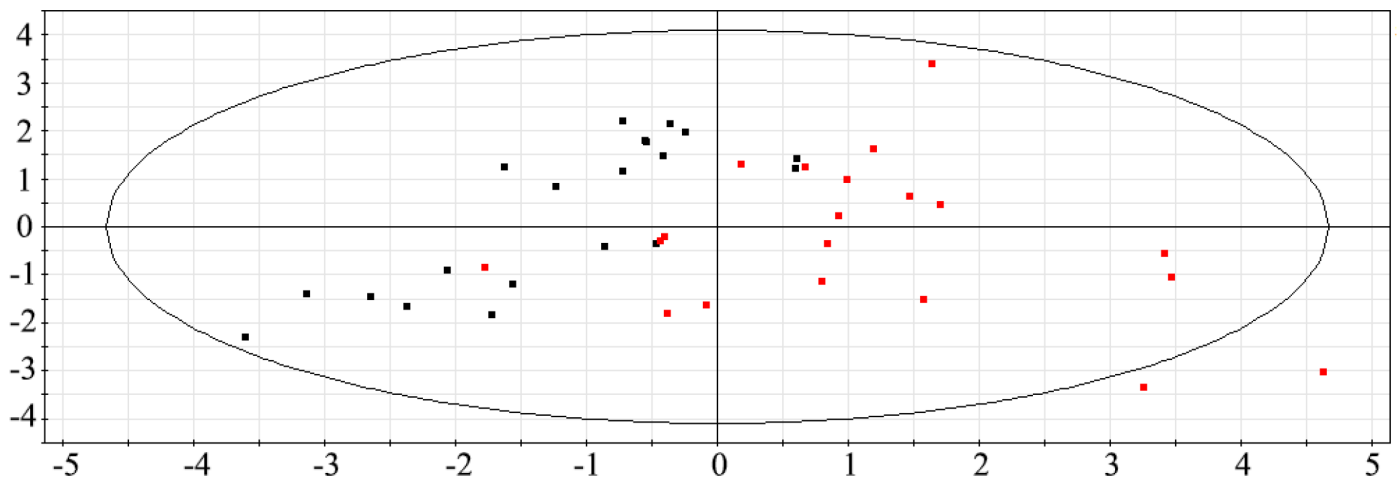

Supplementary Table 4-2: Principal component oval score of the data from health and CRC rat's plasma by PCA analysis.

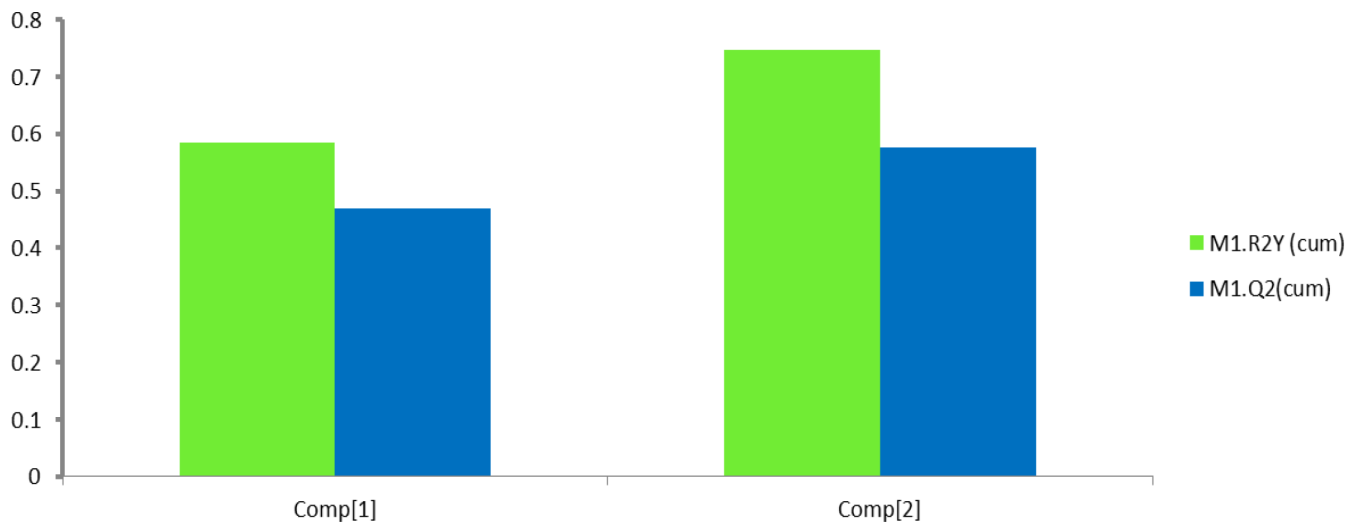

Supplementary Table 4-3: Analysis of the cumulative contribution rate of the main components of the data by PLS-DA in normal and CRC rats.

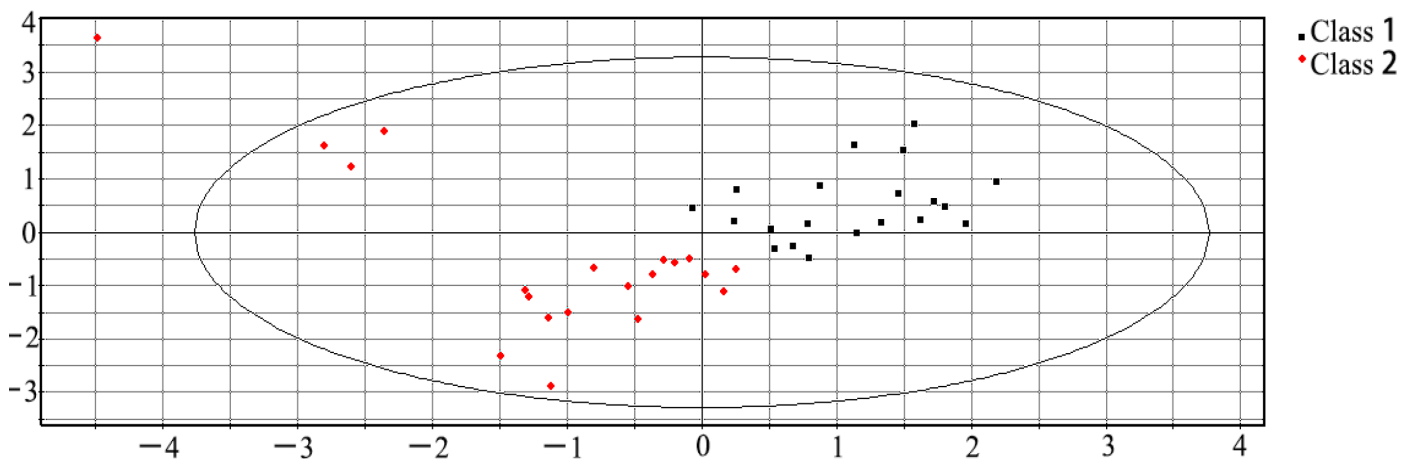

Supplementary Table 4-4: Principal component oval score of the data from normal and CRC rats's plasma by PLS-DA analysis.

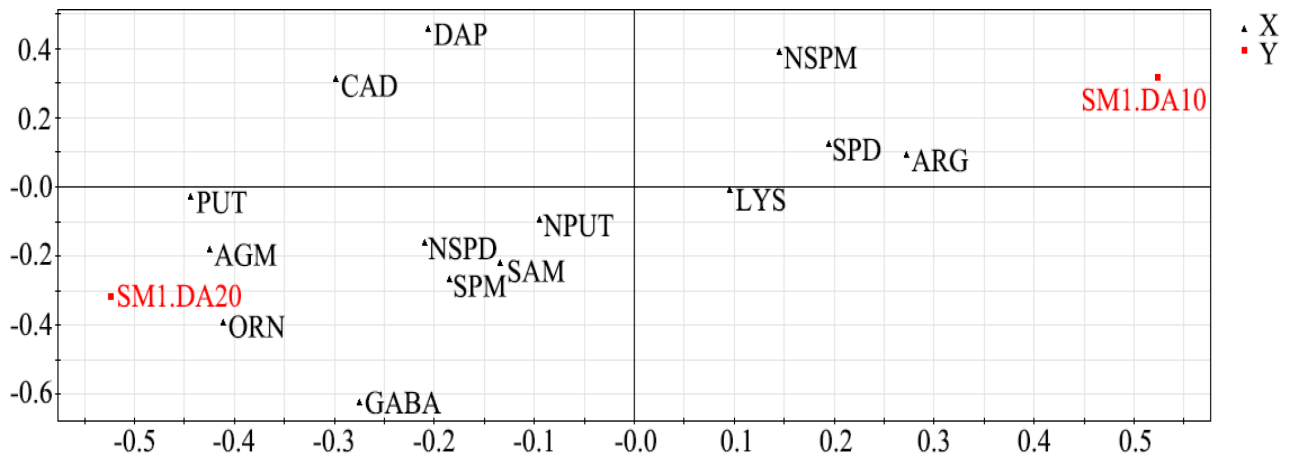

Supplementary Table 4-5: Load chart of the data from health and CRC rat's plasma by PLS-DA analysis.

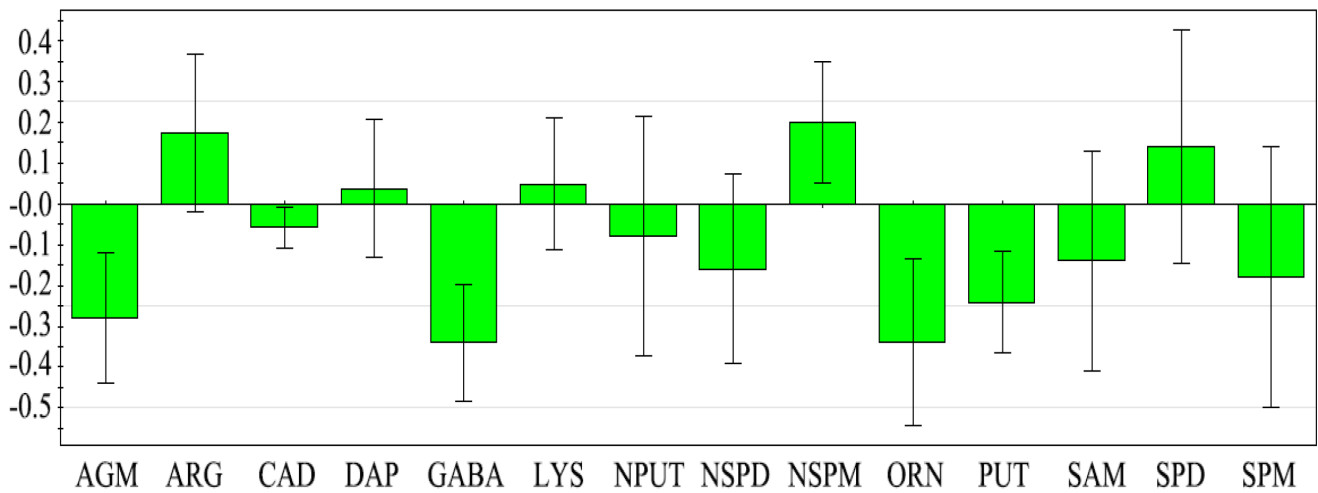

Supplementary Table 4-6: Principal component coefficient of the data from health and CRC rat's plasma by PLS-DA analysis.

**Supplementary Table 4-7: Principal component coefficient factor of the data from health and CRC rat's plasma by PLS-DA analysis**

| Var ID(Primary) | M1.CoeffC S[2](\$M1.DA10) | Var ID(Primary) | M1.CoeffC S[2] (\$M1.DA10) |
|-----------------|---------------------------|-----------------|----------------------------|
| \$constant      | 0.9874                    | NSPD            | -0.1604                    |
| AGM             | -0.2797                   | NSPM            | 0.1998                     |
| ARG             | 0.1724                    | ORN             | -0.3386                    |
| CAD             | -0.0575                   | PUT             | -0.2414                    |
| DAP             | 0.0306                    | SAM             | -0.1399                    |
| GABA            | -0.3407                   | SPD             | 0.141                      |
| LYS             | 0.04827                   | SPM             | -0.1804                    |
| NPUT            | -0.07964                  |                 |                            |

**Supplementary Table 4-8: The iteration data by logistic regression analysis from normal and CRC rat plasma**

| step | -2 log likelihood  | Cox & Snell R <sup>2</sup> | Nagelkerke R <sup>2</sup> |
|------|--------------------|----------------------------|---------------------------|
| 1    | 48.76 <sup>a</sup> | 0.243                      | 0.324                     |
| 2    | 40.32 <sup>b</sup> | 0.375                      | 0.500                     |
| 3    | 32.99 <sup>b</sup> | 0.471                      | 0.628                     |
| 4    | 18.10 <sup>c</sup> | 0.623                      | 0.830                     |

a. Because the parameter estimates are less than 0.001, the number of iterations is estimated at 5 iterations.

b. Because the parameter estimates are less than .001, the number of iterations is estimated at 6 iterations.

c. Because the parameter estimates are less than .001, the number of iterations is estimated at 9 iterations.

**Supplementary Table 4-9: Classification by logistic regression analysis from normal and CRC rat plasma**

|        | observed         | forecast |      |    | Percentage correction |
|--------|------------------|----------|------|----|-----------------------|
|        |                  | VAR00016 |      |    |                       |
|        |                  | 0.00     | 1.00 |    |                       |
| step 1 | VAR00016         | 0.00     | 18   | 4  | 81.8                  |
|        |                  | 1.00     | 5    | 17 | 77.3                  |
|        | Total percentage |          |      |    | 79.5                  |
| step 2 | VAR00016         | 0.00     | 16   | 6  | 72.7                  |
|        |                  | 1.00     | 5    | 17 | 77.3                  |
|        | Total percentage |          |      |    | 75.0                  |
| step 3 | VAR00016         | 0.00     | 17   | 5  | 77.3                  |
|        |                  | 1.00     | 4    | 18 | 81.8                  |
|        | Total percentage |          |      |    | 79.5                  |
| step 4 | VAR00016         | 0.00     | 21   | 1  | 95.5                  |
|        |                  | 1.00     | 2    | 20 | 90.9                  |
|        | Total percentage |          |      |    | 93.2                  |

Cut value 0.500

**Supplementary Table 4-10: Variable analysis by logistic regression analysis from normal and CRC rat plasma**

|                     |          | <b>B</b> | <b>S.E,</b> | <b>Wals</b> | <b>df</b> | <b>Sig.</b> | <b>Exp (B)</b> |
|---------------------|----------|----------|-------------|-------------|-----------|-------------|----------------|
| step 1 <sup>a</sup> | PUT      | 0.00177  | 0.00067     | 6.980       | 1         | 0.008       | 1.002          |
|                     | constant | -2.783   | 1.065       | 6.826       | 1         | 0.009       | 0.062          |
| step 2 <sup>b</sup> | AGM      | 0.223    | 0.0981      | 5.177       | 1         | 0.023       | 1.250          |
|                     | PUT      | 0.00213  | 0.00081     | 6.849       | 1         | 0.009       | 1.002          |
| step 3 <sup>c</sup> | constant | -4.941   | 1.640       | 9.07        | 1         | 0.003       | 0.007          |
|                     | AGM      | 0.2331   | 0.1132      | 4.242       | 1         | 0.039       | 1.263          |
|                     | constant | 0.00375  | 0.00173     | 4.711       | 1         | 0.030       | 1.004          |
| step 4 <sup>d</sup> | PUT      | 0.00279  | 0.00109     | 6.551       | 1         | 0.010       | 1.003          |
|                     | constant | -11.055  | 3.582       | 9.52        | 1         | 0.002       | 0.000          |
|                     | AGM      | 0.4866   | 0.2302      | 4.469       | 1         | 0.035       | 1.627          |
|                     | ARG      | -0.00092 | 0.00037     | 6.178       | 1         | 0.013       | 0.999          |
|                     | GABA     | 0.00916  | 0.00487     | 3.534       | 1         | 0.060       | 1.009          |
|                     | PUT      | 0.00631  | 0.00230     | 7.520       | 1         | 0.006       | 1.006          |
|                     | constant | -12.50   | 6.629       | 3.559       | 1         | 0.059       | 0.000          |

a. Variables entered in step 1: PUT

c. Variables entered in step 3: GABA

b. Variables entered in step 2: AGM

d. Variables entered in step 4: ARG
